## 1 Title

2 Intercellular communication controls agonist-induced calcium oscillations independently of  
3 gap junctions in smooth muscle cells.

## 4 Authors

5 S.E. Stasiak<sup>1</sup>, R.R. Jamieson<sup>1</sup>, J. Bouffard<sup>1,2</sup>, E.J. Cram<sup>2,1</sup>, and H. Parameswaran<sup>1\*</sup>

## 7 Affiliations

8 <sup>1</sup> Department of Bioengineering, Northeastern University, Boston, MA 02115.

9 <sup>2</sup> Department of Biology, Northeastern University, Boston, MA 02115.

10  
11 \*Correspondence may be addressed to [h.parameswaran@northeastern.edu](mailto:h.parameswaran@northeastern.edu).

12  
13 **Abstract:** We report the existence of a unique mode of communication among human smooth  
14 muscle cells (SMCs) where they use force to frequency modulate long-range calcium  
15 waves. An important consequence of this mechanical signaling is that changes in stiffness  
16 of the underlying extracellular matrix can interfere with the frequency modulation of Ca<sup>2+</sup>  
17 waves causing healthy SMCs to falsely perceive a much higher agonist dose than they  
18 actually received. This distorted sensing of contractile agonist dose on stiffer matrices is  
19 absent in isolated SMCs, even though the isolated cells can sense matrix rigidity. We show  
20 that intercellular communication that enables this collective Ca<sup>2+</sup> response does not involve  
21 transport across gap junctions or extracellular diffusion of signaling molecules. The aberrant  
22 communication between cells that distorts the individual cell's perception of contractile  
23 stimulus can explain the sudden, exaggerated narrowing of the lumen when exposed to low  
24 dose of inhaled agonists in diseases like asthma.

## 26 MAIN TEXT

### 28 Introduction

29 Excessive constriction of hollow, tubular transport organs including airways and  
30 vasculature is a common pathophysiological feature of widespread disease conditions like  
31 asthma and hypertension. The vessel/airway wall undergoes significant pathological  
32 changes in the smooth muscle(1) and in the extracellular matrix (ECM) that surrounds and  
33 supports the cells (2) with the onset of disease. The search for mechanisms that underlie the  
34 development of these diseases and the search for novel therapies has largely focused on the  
35 smooth muscle cells (SMCs)(3), as they are the primary effectors of constriction. The  
36 pathological changes in the ECM(2, 4), on the other hand, have not received much attention.  
37 More recent studies show that changes in the ECM can impact organ function at the very  
38 early stages, and can even precede thickening of the muscle layer(5). Perhaps,  
39 mechanobiological interactions between healthy SMCs and an altered ECM are playing a  
40 more critical role in the pathogenesis and progression of diseases like asthma and  
41 hypertension than is currently appreciated. In this study, we examined how changes in the  
42 matrix stiffness can impact how SMCs sense the dose of an applied agonist.

43 Agonist induced Ca<sup>2+</sup> oscillations and long-range Ca<sup>2+</sup> waves are critical mechanisms that  
44 regulate vital parameters such as blood pressure and airway resistance(6, 7). Binding of a  
45 muscle agonist, like histamine or acetylcholine, to a surface receptor on the SMC and the  
46 subsequent rise in cytosolic Ca<sup>2+</sup> concentration, is the universal trigger for force generation

47 in the smooth muscle(8). Agonist exposure induces  $\text{Ca}^{2+}$  oscillations in SMCs that propagate  
48 as waves within the smooth muscle layer(9). These agonist-induced  $\text{Ca}^{2+}$  oscillations serve  
49 two critical functions in the smooth muscle: (A) The concentration/dose of agonist detected  
50 by the surface receptors is transduced into the frequency of  $\text{Ca}^{2+}$  oscillations, with higher  
51 concentration of muscle agonist resulting in higher frequency of  $\text{Ca}^{2+}$  oscillations, which  
52 can then be detected by downstream  $\text{Ca}^{2+}$  sensors and translated into a dose-dependent  
53 increase in smooth muscle contractility(6, 10). (B) Agonist-induced  $\text{Ca}^{2+}$  oscillations  
54 propagate as waves around the circumference of the organ and enable the synchronized  
55 contractions of SMCs necessary to constrict the airway/blood vessels (9). At present, little  
56 is known about the role of extracellular mechanical factors such as ECM stiffness in  
57 regulating agonist-induced  $\text{Ca}^{2+}$  oscillations and  $\text{Ca}^{2+}$  waves that can move across an SMC  
58 ensemble.

59 In this study, we report a collective phenomenon in clusters of human airway smooth  
60 muscle, where ECM stiffness alters the intercellular communication between cells in an  
61 SMC ensemble causing increased  $\text{Ca}^{2+}$  oscillation frequencies and synchronized  $\text{Ca}^{2+}$   
62 oscillations. This altered  $\text{Ca}^{2+}$  response results in the higher level of agonist-induced force  
63 by SMCs on stiff substrates. We examined intercellular transport of  $\text{Ca}^{2+}$  in SMC cells and  
64 we show that contrary to dogma, the physical mechanism that enables intercellular  $\text{Ca}^{2+}$   
65 waves does not involve molecular transport across gap junctions or paracrine signaling  
66 through extracellular diffusion. Rather, this phenomenon appears to be driven by force-  
67 transfer among cells in the cluster. The collective response of SMCs to agonist could be a  
68 mechanism by which matrix remodeling can drive disease progression in asthma and  
69 hypertension.

## 70 Results

### 71 **1. Matrix stiffness alters the $\text{Ca}^{2+}$ response to agonist in multicellular clusters of SMCs,** 72 **but not in isolated cells.**

73 Modeling the SMC layer in 2D using micropatterning: To study the role of altered matrix  
74 stiffness on the frequency of  $\text{Ca}^{2+}$  oscillations, we used micropatterning to create a 2D  
75 approximation of the organization of SMCs seen in lung slices (Fig. 1A). The substrate we  
76 use is NuSil(11), an optically clear, non-porous polydimethylsiloxane substrate whose  
77 Young's modulus,  $E$ , can be varied in the range 0.3 kPa-70 kPa(11). Based on measurements  
78 of ECM stiffness in healthy human airways, we set the ECM stiffness of healthy human  
79 airways to  $E=0.3$  kPa(12). This matches the ECM stiffness of small airways (inner  
80 diameter<2 mm) which are known to collapse in asthma(13). With the onset of airway  
81 remodeling, collagen is deposited in the airways and the stiffness of the ECM increases(2,  
82 14). A substrate stiffness of  $E=13$  kPa was used to mimic remodeled ECM. Using a  $\text{Ca}^{2+}$   
83 sensitive fluorescent dye (Fluo4-AM), we imaged and quantified the time period of  $\text{Ca}^{2+}$   
84 oscillations in these SM rings plated on soft and stiff ECM. Images were recorded at a rate  
85 of 1 per second for 5 minutes following exposure to  $10^{-5}$  M histamine. On soft ECM ( $E=0.3$   
86 kPa), exposure to histamine resulted in  $\text{Ca}^{2+}$  oscillations with a time period of  $44.13 \pm 21.76$   
87 seconds ( $N=195$ , Fig. 1E). When the substrate stiffness was increased to  $E=13$  kPa, the same  
88 dose of agonist-induced significantly faster oscillations with a time period of  $21.79 \pm 8.90$   
89 seconds ( $N=172$ ,  $p<0.001$ , Mann-Whitney test, Fig. 1E). Therefore, at the *same* dose of  
90 agonist, stiff substrates resulted in a doubling of the cytosolic  $\text{Ca}^{2+}$  oscillation frequency in  
91 healthy smooth muscle cells.

92 Interactions between ECM and isolated cells are insufficient to explain altered  $\text{Ca}^{2+}$   
93 response: To explain the role of matrix stiffness in regulating the  $\text{Ca}^{2+}$  response to a low  
94 dose of agonist, we first hypothesized that this phenomenon was linked to cell-matrix  
95 interactions at the level of the individual cell. With increased matrix stiffness, SMCs  
96 develop higher cytoskeletal prestress(15) opening stretch-activated  $\text{Ca}^{2+}$  channels(16) and  
97 potentially increasing the  $\text{Ca}^{2+}$  flux into the cell. To test this hypothesis, we cultured human  
98 airway SMCs at a low density such that individual cells were isolated, spaced at least 100  
99  $\mu\text{m}$  from each other (Fig. 1B). We first measured baseline traction (pre-agonist) stress  
100 exerted by these isolated cells on the substrate to confirm that the baseline traction was  
101 significantly higher in isolated cells cultured on stiff versus cells cultured on soft substrates  
102 ( $6.98 \pm 1.7$  Pa,  $N=16$  on soft vs  $15.95 \pm 5.0$  Pa,  $N=21$  on stiff substrate,  $p < 0.001$ , Mann-  
103 Whitney test). We then exposed these isolated SMCs to  $10^{-5}$  M histamine and measured the  
104 time period of  $\text{Ca}^{2+}$  oscillations. Contrary to our expectations, ECM stiffness had no impact  
105 on the  $\text{Ca}^{2+}$  response of isolated SMCs to  $10^{-5}$  M histamine (Fig. 1F). Cells cultured on the  
106 stiff substrate had a mean period of  $62.65 \pm 25.86$  seconds ( $N=24$ ) and those on the soft  
107 matrix had a mean period of  $67.46 \pm 33.79$  seconds ( $N=29$ ), which was not statistically  
108 significantly different. Therefore, despite the higher levels of prestress in individual cells,  
109 ECM stiffening has no impact on the agonist-induced  $\text{Ca}^{2+}$  frequency of isolated cells.

110 SMCs sense matrix as a collective and alter their  $\text{Ca}^{2+}$  response to agonist: To probe this  
111 phenomenon further, starting with the isolated SMCs (Fig. 1B), we increased the seeding  
112 density (Fig. 1C) until we had a confluent cluster of SMCs (Fig. 1D). At each seeding  
113 density, we measured the time period of  $\text{Ca}^{2+}$  oscillations for SMCs adhering to soft ( $E=0.3$   
114 kPa) and stiff ( $E=13$  kPa) substrates in response to  $10^{-5}$  M histamine (Fig. 1F-1H). Sparsely  
115 seeded cells (Fig. 1G) responded similarly to isolated cells (Fig. 1F), exhibiting no  
116 statistically significant difference between the agonist-induced  $\text{Ca}^{2+}$  oscillations on soft and  
117 stiff matrix. The time period of oscillations of sparse SMCs on the soft substrate was  
118  $48.80 \pm 27.33$  seconds ( $N=112$ ) and  $51.38 \pm 31.22$  seconds ( $N=121$ ) on the stiff substrate (Fig.  
119 1G). Confluent cells behaved like those patterned in a ring, with cells plated on stiffer  
120 substrate exhibiting a significantly higher frequency of  $\text{Ca}^{2+}$  oscillations in response to  $10^{-5}$   
121 M histamine. Confluent SMCs on soft matrix had a mean period of  $60.30 \pm 29.55$  seconds  
122 ( $N=211$ ), and the same healthy, confluent cells on stiff matrix had a mean period of  
123  $34.23 \pm 13.01$  seconds ( $N=212$ ) (Fig. 1H). These results suggest a collective phenomenon in  
124 smooth muscle cells where clusters of confluent SMCs, but not isolated cells, can sense and  
125 respond to changes in matrix stiffness. This finding is extremely significant in all smooth  
126 muscle pathologies because all downstream  $\text{Ca}^{2+}$  dependent molecular processes rely on  
127  $\text{Ca}^{2+}$  oscillations to perceive the external concentration of contractile agonist detected by  
128 the G-protein coupled receptors on the cell surface. Here we show that the combination of  
129 confluence and ECM stiffness can alter how cells perceive contractile agonist.

## 130 **2. Matrix stiffening synchronizes $\text{Ca}^{2+}$ oscillations within a multicellular SMC cluster.**

131 We next explored the nature of intercellular communication underlying the collective  
132 agonist-induced  $\text{Ca}^{2+}$  response in SMCs. To do this, we first analyzed the time series of  
133 histamine-induced  $\text{Ca}^{2+}$  oscillations for signs of interactions among the different SMCs  
134 within a confluent cluster. After correcting for drift due to photobleaching of the  
135 fluorophore, we calculated the cross-correlation coefficient ( $\rho_{i,j} \in [-1,1]$ ) of the  $\text{Ca}^{2+}$   
136 oscillations occurring in the  $i^{\text{th}}$  cell and the  $j^{\text{th}}$  cell in the cluster for all the cells in a cluster.  
137 The measured values of  $\rho_{i,j}$  in a typical SMC cluster is depicted in Fig. 2A as a  
138 representative  $24 \times 24$  matrix, with the extreme values  $\rho_{i,j} \rightarrow 1$  (pink) indicating that the  $\text{Ca}^{2+}$

139 levels in the  $i^{\text{th}}$  and  $j^{\text{th}}$  cell rise and fall perfectly in sync with each other (perfectly correlated)  
140 (Fig. 2B),  $\rho_{i,j} = -1$  (green) indicating that when the  $\text{Ca}^{2+}$  levels in  $i^{\text{th}}$  cell rises, the  $\text{Ca}^{2+}$   
141 levels in the  $j^{\text{th}}$  cell falls and vice-versa (anti-correlated),  $\rho_{i,j} \rightarrow 0$  (white) indicating no  
142 correlation in the  $\text{Ca}^{2+}$  oscillations occurring in  $i^{\text{th}}$  and  $j^{\text{th}}$  cell (Fig. 2C). To avoid the effects  
143 of histamine diffusion, the first 60 seconds immediately after application of histamine was  
144 not considered in the correlation calculation. Histograms of  $\rho_{i,j}$  measured in isolated SMCs  
145 and confluent clusters of SMCs cultured on soft and stiff matrices are shown in Figs. 2D  
146 and 2E. Isolated SMCs (Fig. 2D), did not exhibit correlated  $\text{Ca}^{2+}$  oscillations, with a mean  
147  $\rho$  of zero, regardless of whether they were cultured on soft ( $0 \pm 0.34$ ,  $N = 435$ ) or stiff ( $0 \pm 0.32$ ,  
148  $N = 276$ ) substrates. However, for cells in a confluent cluster, matrix stiffening caused a  
149 statistically significant shift in  $\rho$  towards positive correlation (Fig. 2E). The mean  $\rho$  for  
150 confluent clusters on soft matrices was  $0.09 \pm 0.28$ ,  $N = 31125$ , versus on stiff matrices,  $\rho$   
151 increased to  $0.36 \pm 0.31$   $N = 31125$ . A two-way ANOVA test with confluence and ECM  
152 stiffness as independent factors showed a significant interaction between confluence and  
153 ECM stiffness ( $P < 0.001$ ). Post-hoc pairwise comparisons with the Tukey test showed a  
154 significant difference in the pairwise correlations in SMC clusters due to ECM stiffness, but  
155 no difference due to ECM stiffness in the correlations measured in isolated SMCs. There  
156 was no systematic trend in the distance between SMCs and the correlation in  $\text{Ca}^{2+}$   
157 oscillations.

158 Next, we investigated the time it takes after the addition of histamine for the  $\text{Ca}^{2+}$   
159 oscillations to synchronize. In order to do this, we repeated the previous calculation of cross-  
160 correlations, but instead of using the entire time series, we used a time window of 120  
161 seconds starting at  $t = 60$  seconds after addition of histamine and repeated the  $\rho_{i,j}$  calculation  
162 for the  $\text{Ca}^{2+}$  time series within this 120 seconds window for all cells in the cluster. The time  
163 window was then shifted in increments of 15 seconds over the rest of the 5-minute time  
164 frame over which we measured  $\text{Ca}^{2+}$  oscillations. Shown in Fig. 2F and Fig. 2G is the  
165 average through time, of cross-correlation coefficients between all cells either isolated or  
166 confluent,  $\overline{\rho_{i,j}}(\tau)$  on soft and stiff matrix respectively. The correlation coefficients of  
167 confluent SMCs on stiff matrix gradually increase over time, for about 1 minute, which  
168 matches the time course for force generation in airway SMCs (17). Similar to our findings  
169 from the previous section, these results demonstrate that not only does the combination of  
170 a stiff matrix and confluent cluster of cells lead to faster  $\text{Ca}^{2+}$  oscillations, but it also causes  
171 histamine-induced  $\text{Ca}^{2+}$  oscillations to synchronize across the cells in the cluster.

### 172 **3. Gap junctions do not play a role in regulating the collective $\text{Ca}^{2+}$ response of SMC** 173 **clusters.**

174 The most well studied long-range communication mechanism in multicellular systems is  
175 the intercellular waves of  $\text{Ca}^{2+}$  capable of propagating over distances much longer than a  
176 cell length through a regenerative  $\text{Ca}^{2+}$  induced  $\text{Ca}^{2+}$  release mechanism (18). This mode of  
177 communication is mediated through two critical pathways: (i) gap junction channels, which  
178 connect the cytoplasm of neighboring cells and allow for the transport of signaling  
179 molecules from one cell to its neighbor and (ii) extracellular diffusion of a signaling  
180 molecule like ATP, which can diffuse and bind to purinergic receptors on neighboring cells,  
181 causing  $\text{Ca}^{2+}$  release in these cells (19).

182 Transport through gap junctions is unaffected by ECM stiffness: We first fluorescently  
183 labeled gap junctions by staining for connexin-43 (Cx43). The expression of Cx43 (red) for  
184 confluent clusters of SMCs on soft and stiff substrates are shown in Figs. 3A and 3B,



185 respectively. The actin filaments (green) and the nucleus (blue) are also labeled. From these  
186 images, we quantified the number of gap junctions per cell for approximately N=170 cells  
187 each for soft and stiff substrate (Fig. 3C). There was no significant difference between Cx43  
188 expression on soft and stiff substrates (Mann-Whitney test, P=0.507). Next, we tested  
189 whether ECM stiffness induced a change in the efficiency of transport through gap  
190 junctions. To this end, we employed a commonly used technique to quantitatively assess  
191 the efficiency of transport through gap junctions called gap-FRAP(20). Briefly, a confluent  
192 layer of SMCs was incubated with membrane-permeable calcein-AM. Upon entering the  
193 cell, the acetyl methyl ester bond was hydrolyzed by intracellular esterases, trapping the  
194 hydrophilic calcein molecule within the cell (Fig. 3D, column 1). The calcein in one cell  
195 selected at random was then bleached using a high-intensity laser (Fig. 3D, column 2). The  
196 bleached calcein molecules and the unbleached calcein molecules in neighboring cells  
197 diffuse through gap junctions leading to a recovery in fluorescence (Fig. 3D, column 3).  
198 The kinetics and extent of recovery in fluorescence in the bleached cell reflects the  
199 efficiency of transport across gap junctions via diffusion. A typical recovery curve from  
200 confluent SMCs cultured on soft and stiff matrices are shown in Fig. 3E. We found no  
201 difference in the extent of recovery as quantified by the mobile fraction,  $\Gamma = \frac{F_r - F_b}{F_0 - F_b} \times 100\%$ ,  
202 where  $F_0, F_b, F_r$  indicate the fluorescence intensity in the target cell at baseline, after  
203 bleaching and after recovery, respectively (Fig. 3F) (P=0.532, t-test). We also did not  
204 observe any statistically significant difference in the rate of recovery in fluorescence  $k_r$ ,  
205 which was calculated by fitting an exponential function  $F(t) = F_b + F_r(1 - e^{-k_r t})$  to the  
206 recovery curve. On soft ECM,  $k_r$  was  $0.014 \pm 0.018$  and on stiff ECM,  $k_r$  was  $0.011 \pm 0.05$   
207 (P=0.55, t-test).

208 Blocking gap junctions does not affect agonist-induced  $\text{Ca}^{2+}$  oscillations: To further explore  
209 the role of gap junctions in the collective response of the SMCs to agonist, we used 30  $\mu\text{M}$   
210 of 18  $\beta$ -glycyrrhetic acid ( $\beta\text{GA}$ ) to uncouple gap junctions. We first used gap-FRAP to  
211 verify that a 30  $\mu\text{M}$  dose of  $\beta\text{GA}$  is sufficient to completely block transport across gap  
212 junctions. The mobile fraction,  $\Gamma$ , measured in a confluent layer of SMCs after application  
213 of 30  $\mu\text{M}$   $\beta\text{GA}$  dropped significantly from  $40.05 \pm 9.18\%$  to  $6.84 \pm 2.89\%$  (N=18, t-test,  
214 P<0.001) (Fig. 3F). This recovery is similar to the 7.89% recovery we measured in an  
215 isolated cell. Similar minimal recovery has been noted in the literature(21), indicating that  
216 transport across gap junctions was blocked. We then measured histamine-induced  $\text{Ca}^{2+}$   
217 oscillations in confluent clusters of SMCs. Much to our surprise, we found that blocking  
218 gap junctional transport had no impact on the histamine-induced  $\text{Ca}^{2+}$  oscillation periods in  
219 multicellular clusters of SMCs, regardless of the stiffness of the ECM (Fig. 3G). A two-  
220 factor ANOVA with treatment ( $\beta\text{GA}$ ) and ECM stiffness as the two independent factors  
221 showed no difference in the time period of histamine-induced  $\text{Ca}^{2+}$  oscillations (P=0.579)  
222 due to treatment. Post-hoc pairwise comparisons showed the  $\text{Ca}^{2+}$  oscillations remained  
223 significantly faster on the stiff matrix (P<0.001) even after blocking gap junctions.

#### 224 **4. Mechanical force transfer among cells regulates the collective $\text{Ca}^{2+}$ response of SMC** 225 **clusters.**

226  $\text{Ca}^{2+}$  wave propagation follows the contractile axis of the SMCs: Next, we considered  
227 extracellular diffusion of signaling molecules, such as ATP, as a possible mode of  
228 intercellular communication that enables the collective  $\text{Ca}^{2+}$  response of SMC clusters on  
229 stiff matrices(18). In order to do this, we measured the direction in which the  $\text{Ca}^{2+}$  wave  
230 propagates from one cell to the next in SMC clusters cultured on stiff substrates. If we select  
231 a cell in an SMC cluster, a wave that passes through it will appear as a localized increase in

232  $\text{Ca}^{2+}$  in the cell which is followed by a localized increase in  $\text{Ca}^{2+}$  in one of its neighbors. We  
233 reasoned that if the intercellular  $\text{Ca}^{2+}$  transport was being enabled by extracellular diffusion  
234 of signaling molecules, then the resulting  $\text{Ca}^{2+}$  wave should have an equal chance of moving  
235 in all directions (isotropic). We split the direction of propagation of the  $\text{Ca}^{2+}$  wave from an  
236 SMC into two directions: a direction parallel to the contractile axis of the SMC, and a  
237 direction perpendicular to the contractile axis of the SMC. For the cell labeled 1 shown in  
238 Fig. 4A (insets), cells 2 and 4 were considered parallel to cell 1's contractile axis and cells  
239 3 and 5 were considered perpendicular to cell 1's contractile axis. We calculated the  
240 conditional probability for a localized increase in  $\text{Ca}^{2+}$  in one cell to be followed by a  
241 localized increase in a parallel neighbor versus its perpendicular neighbor. This conditional  
242 probability quantifies the isotropy in  $\text{Ca}^{2+}$  wave propagation with respect to the contractile  
243 axis of the SMC, with equal probability (0.5) in parallel and perpendicular direction  
244 indicating isotropy in  $\text{Ca}^{2+}$  wave propagation. Instead, we found that there was an  
245  $80.5 \pm 7.53\%$  chance for the  $\text{Ca}^{2+}$  wave to follow the contractile axis of the SMC (Fig. 4B, N  
246 =50 cells, Mann-Whitney test,  $P < 0.001$ ). The high probability of the  $\text{Ca}^{2+}$  wave to follow  
247 the contractile axis of the SMCs rules out extracellular diffusion as the dominant mechanism  
248 for intercellular communication in our experiments.

249 Mechanical force transfer between SMCs regulates their  $\text{Ca}^{2+}$  response: Thus far, we have  
250 ruled out transport through gap junctions and extracellular diffusion, the two widely  
251 accepted mechanisms responsible for intercellular communication in confluent cell clusters  
252 using  $\text{Ca}^{2+}$  waves (18). The propensity of  $\text{Ca}^{2+}$  waves to follow the direction of the contractile  
253 axis of the SMC suggested force transfer between neighboring SMCs as a potential  
254 mechanism that regulates the collective  $\text{Ca}^{2+}$  response of SMC clusters. To quantify SMC  
255 forces in our confluent clusters, we used Fourier transform traction force microscopy (22) to  
256 measure the traction forces generated by  $10^{-5}$  M histamine. Fig. 4C depicts the traction force  
257 vectors overlaid on the corresponding confluent SMCs, indicating stress magnitude in  
258 vector length and color, and stress direction. We found that histamine generated normalized  
259 traction (post-histamine/pre-histamine) of  $1.22 \pm 0.11$ , (N=12) on soft substrates. On stiffer  
260 matrix, a confluent cluster of SMCs from the same healthy donor and passage generated a  
261 normalized force of  $2.24 \pm 0.26$  (N =21) (Fig. 4D). There was a statistically significant  
262 difference ( $P < 0.001$ , t-test) between the force generated on soft and stiff substrates in  
263 response to the same dose of agonist. To test the possibility that higher force transfer among  
264 cells on stiff substrates was responsible for this collective phenomenon, we tested the effect  
265 of reducing the muscle force on the  $\text{Ca}^{2+}$  oscillations in a confluent cluster of SMCs on stiff  
266 substrates. Starting with a confluent SMC cluster which was cultured on a stiff (13 kPa)  
267 substrate and exposed to  $10^{-5}$  M histamine for 20 minutes, we measured  $\text{Ca}^{2+}$  oscillations  
268 pre- and post-addition of  $10^{-4}$  M chloroquine, a known smooth muscle relaxant (23).  
269 Reducing contractility with chloroquine abrogated  $\text{Ca}^{2+}$  oscillations in the SMC cluster (Fig.  
270 4E). This result suggests contractility is required for the observed collective  $\text{Ca}^{2+}$   
271 oscillations.

272 Confining the SMCs to a straight line reduces the probability of SMCs with low frequency  
273 of  $\text{Ca}^{2+}$  oscillations: Comparing the alignment of SMCs in Fig. 1B to Fig. 1D and Fig. 4A,  
274 we observed that with the onset of confluence, SMCs naturally tend to organize themselves  
275 into spatial clusters of aligned cells. To test the effect of SMC alignment on higher  
276 frequency of  $\text{Ca}^{2+}$  oscillation on stiff substrates, we compared the time period of  $\text{Ca}^{2+}$   
277 oscillations in confluent SMC clusters to the time period of  $\text{Ca}^{2+}$  oscillations in SMC  
278 clusters micropatterned in a line which was (1000  $\mu\text{m}$  long and 15  $\mu\text{m}$  wide,  $\sim 1$  cell wide  
279 and  $\sim 10$  cell lengths long) (Fig. 4F). The idea here was to eliminate the possibility of

intercellular communication occurring perpendicular to the contractile axis in confluent clusters; through mechanisms which are less likely to be influenced by force. We found that while the mean time period of oscillations was nearly identical in both confluent SMC clusters and lines of SMCs, the probability of cells with higher time period of  $\text{Ca}^{2+}$  oscillations decreases when SMCs are aligned (Fig. 4G). An F-test shows a significant decrease in the variability of the time period distribution when the cells are aligned in a line. (N=115,  $P<0.001$ ). This result is consistent with the idea that higher  $\text{Ca}^{2+}$  frequencies are being driven by force transfer along the contractile axis.

## **5. The effect of localized ECM stiffening can be sensed by SMCs over long distances.**

ECM remodeling in airways and blood vessels often occur as spatially localized processes. How does this pathological change in the ECM spread? Current theories(24, 25) require cells to migrate into the region of stiffer ECM for them to sense the altered matrix and respond by excessive secretion of matrix proteins thereby creating a positive feedback loop that leads to spread of this disease. However, given the collective nature of ECM stiffness sensing in SMC clusters, it may be possible for SMCs located far away from the site of ECM remodeling to detect this localized change even though these SMCs are not physically in contact with the stiff ECM. To test this hypothesis and to quantify the distance over which a localized increase in ECM stiffness would be felt by an ensemble of SMCs, we created a dual-stiffness substrate (Fig. 4H), where the region marked in green has Young's modulus of 13 kPa and the region in black has a Young's modulus of 0.3 kPa. We then patterned SMCs in a line starting from the stiff region and extending into the soft region. Cells on soft and stiff ECM were simultaneously exposed to  $10^{-5}$  M histamine, and we measured time period of  $\text{Ca}^{2+}$  oscillations in SMCs on the soft ECM for 5 minutes. The change in  $\text{Ca}^{2+}$  oscillation time period was not sudden as one moved from the stiff to the soft ECM (Fig. 4I). Rather, the mean time period increased at a slow rate of 1.48 s/100  $\mu\text{m}$ . We grouped the cells by distance from the edge into 400  $\mu\text{m}$  bins and statistically tested the difference in the time period of  $\text{Ca}^{2+}$  oscillations between each bin and cells in physical contact with the stiff substrate using the t-test. We found that there was no statistically significant difference between histamine-induced  $\text{Ca}^{2+}$  oscillations for cells on stiff substrates and cells up to 800  $\mu\text{m}$  (approximately 8 cell lengths) away from the edge (N=20, Mann-Whitney test,  $P<0.001$ ). This result demonstrates that spatially localized alterations in the ECM can be detected by SMCs far from the site of ECM remodeling, suggesting that ECM pathology can spread through the organ much faster than currently believed.

## **Discussion**

Increased stiffness of the extracellular matrix (ECM) that surrounds and supports cells in tissue is associated with a number of disease conditions ranging from cancer and fibrosis(26) to cardiovascular(27), lung(2), eye(28), and age-related diseases(29). Traditionally, pathological alterations in the ECM were thought to be the consequence of disease progression. However, it is now becoming increasingly apparent in many diseases that matrix stiffening precedes disease development and could, therefore, contribute to disease progression(5, 30, 31). Recognizing the importance of ECM remodeling, clinical trials were undertaken to restore the healthy, homeostatic state of the ECM(32). These early efforts were unsuccessful(33) and attention has now turned to understanding and targeting the mechanisms by which cells perceive and respond to changes in the ECM(31).

Here, we demonstrate a collective phenomenon in smooth muscle cells (SMC) in which matrix stiffness alters the intercellular communication between cells in an ensemble

327 resulting in elevated contractility at low doses of agonist. We show that this collective  
328 mechanosensing phenomenon is enabled by crosstalk among cells using  $\text{Ca}^{2+}$  waves(18). A  
329 common mechanism of communication involves the molecular transport of  $\text{Ca}^{2+}$  and  
330 inositol trisphosphate ( $\text{IP}_3$ ) across gap junctions. However, our measurements showed no  
331 tendency for molecular transport through gap junctions to differ depending on ECM  
332 stiffness. We blocked transport through gap junctions using 18  $\beta$ -glycyrrhetic acid  
333 ( $\beta\text{GA}$ )(34) and confirmed that the dose we used was sufficient to completely disrupt  
334 molecular transport across gap junctions. Contrary to our expectations based on current  
335 models(18), blocking transport through gap junctions had no impact on the collective  
336 agonist response of SMCs to ECM stiffening. There was no change in the  $\text{Ca}^{2+}$  oscillation  
337 for SMCs on soft and stiff substrates after  $\beta\text{GA}$  treatment. Following a recent finding that  
338 mechanical forces can synchronize contraction of cardiac myocytes in the developing heart  
339 independent of gap junctions(34), we tested whether ECM stiffening led to a switch in the  
340 mode of communication between cells from molecular signaling through gap junctions to  
341 mechanical force based signaling.

342  
343  $\text{Ca}^{2+}$  waves can travel distances far greater than a cell length because  $\text{Ca}^{2+}$  waves regenerate  
344 in each cell by “calcium-induced calcium release” from the endoplasmic reticulum (ER). In  
345 the most widely accepted theory of long-range  $\text{Ca}^{2+}$  transport,  $\text{Ca}^{2+}$  release from the ER is  
346 enabled by a messenger molecule,  $\text{IP}_3$ , which diffuses faster than  $\text{Ca}^{2+}$  and activates the  
347 receptors on the ER, so when the  $\text{Ca}^{2+}$  wave arrives, it can release more  $\text{Ca}^{2+}$ . This theory  
348 had its basis in measurements of  $\text{IP}_3$  diffusivity in the *Xenopus* extract model of the  
349 cytoplasm(35), which put the diffusivity of  $\text{IP}_3$  at  $400 \mu\text{m}^2/\text{s}$  and that of  $\text{Ca}^{2+}$  at  $40 \mu\text{m}^2/\text{s}$ .  
350 However, more recent measurements(36) made in human cells show that  $\text{IP}_3$  diffuses at a  
351 slower rate than  $\text{Ca}^{2+}$ . Our finding that molecular diffusion through gap junctions is not  
352 necessary to sustain  $\text{Ca}^{2+}$  waves in SMC clusters is consistent with the challenge to the  
353 dogma of  $\text{Ca}^{2+}$  wave propagation through gap junctions.

354  
355 In contrast to  $\text{Ca}^{2+}$  wave propagation in other cell types, measurements in confluent SMC  
356 clusters (Fig. 4B) show that  $\text{Ca}^{2+}$  waves follow the direction of the contractile axis of the  
357 SMCs. Further, reducing the SMC force in our experiments with a muscle relaxant stopped  
358 the  $\text{Ca}^{2+}$  oscillations and intercellular  $\text{Ca}^{2+}$  waves (Fig. 4E) suggesting that mechanical force  
359 transfer from one cell to its neighbor enables the intercellular  $\text{Ca}^{2+}$  transport. Can force  
360 transfer between cells also serve as a mechanism which amplifies and modulates the  
361 frequency of oscillations as the  $\text{Ca}^{2+}$  wave moves from cell-to-cell? The mechanisms that  
362 underlie the findings of the present study can be understood in light of previous work from  
363 Felix et al(37) and Tanaka et al(38) who show that forces applied to a cell membrane cause  
364  $\text{PIP}_2$  to be hydrolyzed resulting in an increase in cytosolic  $\text{IP}_3$  concentration. This would  
365 mean that for every SMC cell within a confluent cluster, there are two ways by which  $\text{IP}_3$   
366 can be released into the cytosol: (i) from agonist binding to GPCR receptors on the cell  
367 surface. (ii) from  $\text{IP}_3$  generated by a contracting SMC pulling on its neighbor causing  $\text{IP}_3$   
368 release in the neighboring cell(37, 38). This *additional* method of  $\text{IP}_3$  release only exists for  
369 cells in a confluent cluster. Further, we have previously shown that force transfer between  
370 SMCs increases 8-fold with matrix stiffening(12). Such a force-based  $\text{IP}_3$  release  
371 mechanism can explain how SMC clusters alter their agonist-induced  $\text{Ca}^{2+}$  oscillations in a  
372 matrix stiffness dependent manner while isolated cells, which lack the second source of  $\text{IP}_3$ ,  
373 do not.

374  
375 Dysfunction in the smooth muscle has long been thought to be responsible for the  
376 exaggerated narrowing of transport organs like as asthma, hypertension and Chron’s



377 disease. Asthma is an example of a disease where remodeling of the ECM is well  
378 characterized(2), but its effects are not considered in therapy or drug development.  
379 Asthmatics can be free of inflammation, have spirometry and respiratory mechanics within  
380 the range of healthy individuals up until they are exposed to a smooth muscle agonist at  
381 which point, airways in an asthmatic will hyper-constrict (39). This exaggerated response  
382 of the airway is currently thought to result from sensitization of force-generating pathways  
383 in the SMC due to prolonged exposure to inflammatory agents. Here, we demonstrate that  
384 the fault may instead lie in changes in ECM stiffness that regulate SMC behavior. We show  
385 that a spatially localized change in the ECM might be sufficient for exaggerated force  
386 generation in SMCs far away from the site of ECM remodeling. Consequently, the effects  
387 of ECM remodeling may manifest much earlier in disease progression than currently  
388 believed. Our findings suggest that this exaggerated response to inhaled stimuli might be  
389 the result of aberrant communication between cells that distorts the individual cell's  
390 perception of contractile stimulus. This is a novel mechanism that has not been explored  
391 before in asthma and points to the need to therapeutically target extracellular matrix  
392 remodeling for a lasting cure for diseases like asthma.

## 393 **Materials and Methods**

395 **Fabrication of optically clear substrates of tunable stiffness:** NuSil is an optically clear,  
396 biologically inert PDMS substrate with Young's Modulus tunable in the range from 0.3 kPa  
397 to 70 kPa(11). Equal parts of NuSil gel-8100 parts A and B (NuSil, Carpinteria, CA, USA)  
398 were mixed with various amounts of the crosslinking compound of Sylgard 184 (Dow  
399 Corning, Midland, MI, USA) to adjust substrate stiffness. A crosslinker volume 0.36% of  
400 the combined parts A and B volume was added for substrates with Young's modulus  $E = 13$   
401 kPa, and no crosslinker was added to the 1:1 A:B mixture for substrates with Young's  
402 modulus  $E = 0.3$  kPa. After mixing, the substrate was spin coated onto 30 mm diameter, #1.5  
403 glass coverslips for 50 seconds to produce a 100  $\mu\text{m}$ -thick layer. They settled on a level  
404 surface at room temperature for 1 hour before curing at 60° C overnight. These cured  
405 substrates on coverslips were secured in sterile 40 mm Biotech dishes (Biological Optical  
406 Technologies, Butler, PA, USA) to be used for cell culture.

407 **Matrix protein coating:** In order to coat the entire silicone substrate with protein, a volume  
408 of 0.1% gelatin solution was added and incubated at room temperature in the biosafety cabinet  
409 for 1 hour. To create protein patterns, we utilized the Alvéole's PRIMO optical module and  
410 the Leonardo software, a UV-based, contactless photopatterning system (Alvéole, Paris,  
411 France). The substrate surface was first coated with 500  $\mu\text{g}/\text{mL}$  PLL (Sigma Aldrich, St.  
412 Louis, MO, USA) for 1 hour at room temperature. The substrate was washed with PBS and  
413 10 mM HEPES buffer adjusted to pH 8.0, and then incubated with 50 mg/mL mPEG-SVA  
414 (Laysan Bio, Inc., Arab, AL, USA) at room temperature for 1 hour, and washed with PBS  
415 once more. The PRIMO system was calibrated using fluorescent highlighter on an identical  
416 substrate. The PBS was replaced by 14.5 mg/mL PLPP (Alvéole, Paris, France), and then  
417 the desired pattern, previously created with graphic software, was illuminated with UV light  
418 focused on the substrate surface for 30 seconds. Patterned surfaces were washed again with  
419 PBS and then incubated with 0.1% gelatin for 1 hour at room temperature. The substrate  
420 was washed and maintained hydrated in PBS at 4° C overnight.

421 **Human airway smooth muscle cell culture:** Primary human airway smooth muscle cells  
422 (SMCs) were acquired through the Gift of Hope foundation (via Dr. Julian Solway, M.D.,  
423 University of Chicago) and through ATCC (<https://www.atcc.org>). Both these sources are  
424 public and pertinent medical information about the donor was relayed to us, but all donor  
425 identifiers are removed. The donor remains anonymous and cannot be identified directly or

426 through identifiers linked to the subjects, meeting NIH guidelines. This study was carried  
427 out in accordance with the guidelines and regulations approved by the Institutional  
428 Biosafety Committee at Northeastern University. Cells were grown under standard culture  
429 conditions of 37° C and 5% CO<sub>2</sub> and utilized prior to P7 for traction force experiments and  
430 Ca<sup>2+</sup> imaging experiments. Culture medium: Cells were cultured in 10% fetal bovine serum,  
431 DMEM/F12 (Fisher Scientific), 1x penicillin/streptomycin (Fisher Scientific), 1x MEM  
432 non-essential amino acid solution (Sigma Aldrich), and 25 µg/L Amphotericin B (Sigma  
433 Aldrich). Prior to any measurements, the growth medium was switched to serum-free media  
434 for at least 24 hours. The serum-free medium was comprised of Ham's F-12 media (Sigma  
435 Aldrich), 1x penicillin/streptomycin, 50 µg/L Amphotericin B, 1x glutamine (Fisher  
436 Scientific), 1.7 mM CaCl<sub>2</sub> 2H<sub>2</sub>O, Insulin-Transferrin-Selenium Growth Supplement  
437 (Corning Life Sciences; Tewksbury, MA), and 12 mM NaOH. Both patterned and non-  
438 patterned gelatin-coated substrates were UV sterilized for one hour, then incubated at 37°  
439 C for one hour before seeding human airway SMCs, passage 3-6. For patterned substrates,  
440 cells were seeded in Biotech dishes at 10<sup>4</sup> cells per cm<sup>2</sup> and incubated for 10 minutes in  
441 10% serum media to allow cells to adhere to patterns. Next, the dishes were washed with  
442 PBS to remove excess cells, and then filled with 10% serum media and incubated for 6 to  
443 24 hours. For non-patterned substrates, cells were seeded at the desired density and then  
444 incubated in 10% serum media for 6 to 24 hours. After this time, media was replaced with  
445 serum-free media and incubated for at least 24 hours prior to measurements. For isolated  
446 cells, the seeding density was 10<sup>2</sup> cells per cm<sup>2</sup>. For sparse cells, the seeding density was  
447 10<sup>3</sup> cells per cm<sup>2</sup>. For confluent cells, the seeding density was 10<sup>4</sup> cells per cm<sup>2</sup>.

448 **Fluorescent imaging of Ca<sup>2+</sup>**: Serum-starved airway SMCs were loaded with a fluorescent  
449 cytosolic Ca<sup>2+</sup> indicator to record changes in [Ca<sup>2+</sup>]. FLIPR Ca<sup>2+</sup> 6 (Molecular Devices, San  
450 Jose, CA, USA) was used for all Ca<sup>2+</sup> measurements except Fig. 1A where we used Fluo4-  
451 AM (Sigma Aldrich, St. Louis, MO, USA). The commonly used Fluo4-AM is prone to  
452 photobleaching, and the measured Ca<sup>2+</sup> traces must be bleach corrected prior to  
453 measurements of the time period. FLIPR Ca<sup>2+</sup> 6, on the other hand, did not photobleach  
454 even after 30 minutes of continuous imaging at 1 Hz. Fluo4-AM was prepared according to  
455 the manufacturer's standards. Cells were loaded with 0.2 µM Fluo4-AM solution, diluted  
456 in HBSS, and incubated at room temperature for 1 hour. Next, the cells were washed with  
457 HBSS and incubated in the dark in HBSS for an additional 30 minutes. The cells were  
458 washed once more before imaging. FLIPR Ca<sup>2+</sup> 6 was also prepared according to  
459 manufacturer's standards. Cells were incubated with a 1:1 solution of FLIPR Ca<sup>2+</sup> 6 and  
460 serum-free media at 37° C and 5% CO<sub>2</sub> for 2 hours before imaging. Both Ca<sup>2+</sup> indicators  
461 use acetoxymethyl esters to pass through the cell membrane, which are then hydrolyzed by  
462 cytosolic esterases, trapping the fluorescent dye inside the cell. Cells were imaged with a  
463 Leica DMi8 inverted microscope, a Leica DFC6000 camera (Leica, Wetzlar, Germany), and  
464 a Lumencor Sola SEII LED light source (Lumencor, Beaverton, OR, USA). A FITC filter  
465 cube (excitation: 480/40 nm, emission: 527/50 nm) was used to image the fluorescent dye.  
466 Fluorescent intensity increases with increasing cytosolic [Ca<sup>2+</sup>]. 16-bit images were  
467 recorded at 1 Hz for 1 minute before agonist addition, and for at least 5 minutes after 10<sup>-5</sup>  
468 M histamine exposure. In order to analyze data, each image sequence was loaded in Fiji  
469 ImageJ, and regions of interest (ROIs) were hand-selected in the cytoplasm of each cell to  
470 obtain mean greyscale intensities over the area of the ROI for each frame in time. A custom  
471 MATLAB (MathWorks, Natick, MA, USA) code was written to process the data and  
472 measure mean Ca<sup>2+</sup> oscillation periods. This code measured mean Ca<sup>2+</sup> oscillation periods  
473 by finding peaks in the time series data above a certain prominence and taking the mean of  
474 the time between all sequential peaks.

475 **Cell traction force measurements:** The base NuSil substrates were coated with a layer of  
476 fluorescent beads as fiducial markers for traction force microscopy. A 5% solution of 0.2  
477  $\mu\text{m}$  diameter red fluorescent carboxylate-modified microspheres (FluoSpheres, Invitrogen,  
478 Carlsbad, CA, USA) in PBS was vortexed for 10 seconds. 2 mL of solution was added to  
479 each substrate in a Biotek dish and left at room temperature for 1 hour to allow the beads  
480 to adhere. The bead solution was poured off, substrates were washed 3x with PBS, and then  
481 PBS was poured off. NuSil solution was prepared as described before, with the appropriate  
482 amount of crosslinker to match the stiffness of the base substrate. NuSil was spin-coated  
483 onto the newly bead-coated base substrate at 2500 RPM to create a 1  $\mu\text{m}$ -thick layer and  
484 seal the beads. These substrates rested on a flat surface for 1 hour before curing overnight  
485 at 60° C. Substrates were protein-coated and seeded with cells as before. After a 24-hour  
486 incubation in serum-free media, the SMC tractions were recorded by imaging the  
487 fluorescent beads with a 20x/0.55 dry objective and the Leica DMi8 microscope in an  
488 environmental chamber maintained humidified at 37° C. Images were taken at baseline,  
489 after 15 minute incubation with 10<sup>-5</sup> M histamine, and after cells were removed using RLT  
490 Lysis Buffer (Qiagen, Hilden, Germany). Using these images, cellular forces were  
491 calculated with a custom MATLAB (MathWorks, Natick, MA) software program using  
492 Fourier Traction Force Microscopy(22).

493 **Fluorescent labeling of connexin-43/actin/nuclei:** Cells were fluorescently labeled for  
494 connexin-43 (Cx43) and filamentous actin (F-actin). Cells were fixed in 4%  
495 paraformaldehyde in PBS at room temperature for 10 minutes. Then, cells were  
496 permeabilized with 100% ethanol for 10 minutes at 20° C. Following permeabilization, cells  
497 were blocked using 1x PBS containing 0.1% Tween-20, 1% bovine serum albumin (BSA),  
498 and 22.52 mg/ml glycine for 30 minutes at room temperature. Next, cells were stained for  
499 Cx43 (ab11370; Abcam, Cambridge, UK) at a dilution of 1:200 in 1x PBS containing 1%  
500 BSA for 1 h at 37° C. Secondary antibody labeling and phalloidin staining were done  
501 simultaneously at dilutions of 1:200 and 1:40, respectively, using Alexa Fluor 594  
502 (ab150080; Abcam, Cambridge, UK) and Alexa Fluor 488 Phalloidin (A12379; Invitrogen,  
503 Carlsbad, CA, USA). Lastly, cells were labeled with NucBlue (Fisher Scientific, Waltham,  
504 MA, USA) to label cell nuclei. Images were acquired using a 63x/1.4 oil-immersion  
505 objective (Leica, Wetzlar, Germany).

506 **The gap-FRAP assay:** Gap Fluorescent Recovery After Photobleaching (FRAP) is an  
507 experimental technique that has been established as an effective method of observing gap-  
508 junctional communication of small fluorescent molecules between adjacent cells(21). SMCs  
509 were cultured on NuSil gels of E=0.3 kPa and E=13 kPa until confluence was achieved, and  
510 then serum-starved for at least 24 hours prior to the experiment. Cells were loaded with  
511 1 $\mu\text{M}$  calcein-AM solution diluted in warmed 1x PBS solution and incubated at 37° C and  
512 5% CO<sub>2</sub> for 15 minutes. Calcein-AM is a cell-permeable dye that is hydrolyzed into  
513 fluorescent calcein by cytoplasmic esterases upon entry through cell membrane and has  
514 been shown to permeate through gap junctions due to its low molecular size (622 Da)(20).  
515 After dye incubation, samples were washed with warm 1x PBS solution and returned to  
516 serum-free medium for experiments. FRAP was performed using a ZEISS confocal laser  
517 scanning microscope system equipped with a 20x/0.8 objective and a 488 nm Argon laser.  
518 Fluorescence data was captured using ZEN 2012 SP5 imaging software (ZEISS,  
519 Oberkochen, Germany). Samples were placed in an incubation chamber maintaining 37° C  
520 during experiments to preserve cell viability during imaging. Prior to photobleaching, a  
521 manual ROI was drawn around the border of a target cell visibly connected to adjacent cells.  
522 Whole cells were selected for photobleaching to ensure that fluorescence recovery could  
523 only be attributed to the diffusion of calcein from adjacent cells. Laser power was adjusted

524 to 1% and images were acquired every 5 seconds for 50 seconds using scan speed 12 (pixel  
525 dwell = 0.42  $\mu$ s) to provide baseline fluorescence measurements. After baseline scans were  
526 acquired, the laser power was adjusted to 100% and cells were bleached to at least 20% of  
527 their initial fluorescence using scan speed 2 (pixel dwell = 40  $\mu$ s). Following the bleaching  
528 step, fluorescence recovery images were collected every 5 seconds for approximately 5 mins  
529 at 1% laser power. The images from gap-FRAP experiments were analyzed using Fiji  
530 ImageJ software. First, baseline fluorescence intensities from the target cell were averaged  
531 over the first 10 frames captured to establish a reference value for fluorescence recovery.  
532 Next, fluorescence intensities were measured during the recovery period and divided by the  
533 average baseline intensity to normalize the data. To account for any photobleaching  
534 occurring during the recovery period, fluorescence intensities were collected from a region  
535 at the edge of the field of view. These values were used to adjust the intensity of the target  
536 cell over time to account for fluorescence degradation due to repeated scanning of the  
537 microscopic field, since the edge region was not affected directly during the bleaching step.  
538 The normalized fluorescence values of the bleached cell during recovery were plotted as a  
539 function of time. To compare fluorescence recovery across multiple sample groups, the  
540 mobile fraction of fluorescent molecules was calculated. Mobile fraction ( $\Gamma$ ) measures the  
541 fraction of fluorescent molecules that contribute to recovery of fluorescence in bleached  
542 cells and is calculated as  $\Gamma = \frac{F_r - F_b}{F_0 - F_b} \times 100\%$ , where  $F_0, F_b, F_r$  indicate the fluorescence  
543 intensity in the cell being bleached at baseline, after bleaching and after recovery  
544 respectively (Fig. 3E).

545 **Gap junction blocker experiments:** Gap junctions between confluent SMCs were blocked  
546 with 18 $\beta$ -glycyrrhetic acid ( $\beta$ GA) (Sigma Aldrich, St Louis, MO, USA). Confluent SMCs  
547 on soft (E=0.3 kPa) and stiff (E=13 kPa) substrates were incubated with 30  $\mu$ M  $\beta$ GA at 37 $^\circ$   
548 C and 5% CO<sub>2</sub> for 30 minutes. Although  $\beta$ GA is a common gap junction blocker, it has been  
549 reported to affect cell viability at higher concentrations(40). We used gap-FRAP to find the  
550 lowest possible dose of  $\beta$ GA that still blocked gap junctions between confluent cells, which  
551 we used here in our experiments. This treatment was used in conjunction with the Ca<sup>2+</sup>  
552 imaging protocol to investigate the role of gap junctional diffusion in agonist-induced Ca<sup>2+</sup>  
553 oscillations.

554 **Statistical testing:** Sigmatat (Systat Software, San Jose, CA) was used to perform  
555 statistical tests. Two-factor ANOVAs followed by posthoc pairwise comparisons was used  
556 to test for significant differences in datasets which were influenced by two independent  
557 factors. Pairwise comparisons used the t-test when the data was normally distributed.  
558 Otherwise, the Mann-Whitney test was used to compare the median values. The specific  
559 tests used, the number of samples and the p-value are described along with the  
560 corresponding results. A p-value of 0.05 was used as the threshold for a statistically  
561 significant difference between data sets.

## 562 **References and Notes**

- 564 1. A. L. James, J. G. Elliot, R. L. Jones, M. L. Carroll, T. Mauad, T. R. Bai, M. J. Abramson,  
565 K. O. McKay, F. H. Green, Airway smooth muscle hypertrophy and hyperplasia in asthma.  
566 *Am. J. Respir. Crit. Care Med.* **185**, 1058–1064 (2012).
- 567 2. B. B. Araujo, M. Dolhnikoff, L. F. F. Silva, J. Elliot, J. H. N. Lindeman, D. S. Ferreira, A.  
568 Mulder, H. A. P. Gomes, S. M. Fernezlian, A. James, T. Mauad, Extracellular matrix  
569 components and regulators in the airway smooth muscle in asthma. *Eur. Respir. J. Off. J.*  
570 *Eur. Soc. Clin. Respir. Physiol.* **32**, 61–9 (2008).
- 571 3. R. Saunders, H. Kaul, R. Berair, S. Gonem, A. Singapuri, A. J. Sutcliffe, L. Chachi, M. S.  
572 Biddle, D. Kaur, M. Bourne, I. D. Pavord, A. J. Wardlaw, S. H. Siddiqui, R. A. Kay, B. S.



- 573 Brook, R. H. Smallwood, C. E. Brightling, DP2 antagonism reduces airway smooth muscle  
574 mass in asthma by decreasing eosinophilia and myofibroblast recruitment. *Sci. Transl.*  
575 *Med.* **11**, eaao6451 (2019).
- 576 4. B. C. Berk, K. Fujiwara, S. Lehoux, ECM remodeling in hypertensive heart disease. *J.*  
577 *Clin. Invest.* **117**, 568–75 (2007).
- 578 5. T. Thenappan, S. Y. Chan, E. K. Weir, Role of extracellular matrix in the pathogenesis of  
579 pulmonary arterial hypertension. *Am. J. Physiol. Heart Circ. Physiol.* **315**, H1322–H1331  
580 (2018).
- 581 6. M. J. Sanderson, P. Delmotte, Y. Bai, J. F. Perez-Zogbhi, Regulation of airway smooth  
582 muscle cell contractility by Ca<sup>2+</sup> signaling and sensitivity. *Proc. Am. Thorac. Soc.* **5**, 23–  
583 31 (2008).
- 584 7. Y. S. Prakash, M. S. Kannan, G. C. Sieck, Regulation of intracellular calcium oscillations  
585 in porcine tracheal smooth muscle cells. *Am. J. Physiol.* **272**, C966-75 (1997).
- 586 8. D. C. Hill-Eubanks, M. E. Werner, T. J. Heppner, M. T. Nelson, Calcium signaling in  
587 smooth muscle. *Cold Spring Harb. Perspect. Biol.* **3**, a004549 (2011).
- 588 9. J. F. Perez, M. J. Sanderson, The frequency of calcium oscillations induced by 5-HT, ACh,  
589 and KCl determine the contraction of smooth muscle cells of intrapulmonary bronchioles.  
590 *J. Gen. Physiol.* **125**, 535–553 (2005).
- 591 10. A. B. Parekh, Decoding cytosolic Ca<sup>2+</sup> oscillations. *Trends Biochem. Sci.* **36**, 78–87  
592 (2011).
- 593 11. H. Yoshie, N. Koushki, R. Kaviani, M. Tabatabaei, K. Rajendran, Q. Dang, A. Husain, S.  
594 Yao, C. Li, J. K. Sullivan, M. Saint-Geniez, R. Krishnan, A. J. Ehrlicher, Traction Force  
595 Screening Enabled by Compliant PDMS Elastomers. *Biophys. J.* **114**, 2194–2199 (2018).
- 596 12. S. R. Polio, S. E. Stasiak, R. R. Jamieson, J. L. Balestrini, R. Krishnan, H. Parameswaran,  
597 Extracellular matrix stiffness regulates human airway smooth muscle contraction by  
598 altering the cell-cell coupling. *Sci. Rep.* **9**, 9564 (2019).
- 599 13. N. T. Tgavalekos, M. Tawhai, R. S. Harris, G. Musch, G. Mush, M. Vidal-Melo, J. G.  
600 Venegas, K. R. Lutchen, Identifying airways responsible for heterogeneous ventilation and  
601 mechanical dysfunction in asthma: an image functional modeling approach. *J. Appl.*  
602 *Physiol.* **99**, 2388–2397 (2005).
- 603 14. S. S. An, W. Mitzner, W.-Y. Tang, K. Ahn, A.-R. Yoon, J. Huang, O. Kilic, H. M. Yong, J.  
604 W. Fahey, S. Kumar, S. Biswal, S. T. Holgate, R. A. Panettieri, J. Solway, S. B. Liggett,  
605 An inflammation-independent contraction mechanophenotype of airway smooth muscle in  
606 asthma. *J. Allergy Clin. Immunol.* **138**, 294-297.e4 (2016).
- 607 15. H. Parameswaran, K. R. Lutchen, B. Suki, A computational model of the response of  
608 adherent cells to stretch and changes in substrate stiffness. *J. Appl. Physiol.* **116**, 825–34  
609 (2014).
- 610 16. M. T. Kirber, J. V Walsh, J. J. Singer, Stretch-activated ion channels in smooth muscle: a  
611 mechanism for the initiation of stretch-induced contraction. *Pflugers Arch.* **412**, 339–45  
612 (1988).
- 613 17. S. S. An, B. Fabry, X. Treppe, N. Wang, J. J. Fredberg, Do biophysical properties of the  
614 airway smooth muscle in culture predict airway hyperresponsiveness? *Am. J. Respir. Cell*  
615 *Mol. Biol.* **35**, 55–64 (2006).
- 616 18. L. Leybaert, M. J. Sanderson, Intercellular Ca(2+) waves: mechanisms and function.  
617 *Physiol. Rev.* **92**, 1359–92 (2012).
- 618 19. L. Leybaert, IP3, still on the move but now in the slow lane. *Sci. Signal.* **9**, fs17–fs17  
619 (2016).
- 620 20. M. Abbaci, M. Barberi-Heyob, J.-R. Stines, W. Blondel, D. Dumas, F. Guillemin, J.  
621 Didelon, Gap junctional intercellular communication capacity by gap-FRAP technique: A  
622 comparative study. *Biotechnol. J.* **2**, 50–61 (2007).

- 623 21. M. Kuzma-Kuzniarska, C. Yapp, T. W. Pearson-Jones, A. K. Jones, P. A. Hulley,  
624 Functional assessment of gap junctions in monolayer and three-dimensional cultures of  
625 human tendon cells using fluorescence recovery after photobleaching. *J. Biomed. Opt.* **19**,  
626 015001 (2014).
- 627 22. J. P. Butler, I. M. Tolić-Nørrelykke, B. Fabry, J. J. Fredberg, Traction fields, moments, and  
628 strain energy that cells exert on their surroundings. *Am. J. Physiol. Cell Physiol.* **282**,  
629 C595-605 (2002).
- 630 23. D. a Deshpande, W. C. H. Wang, E. L. McIlmoyle, K. S. Robinett, R. M. Schillinger, S. S.  
631 An, J. S. K. Sham, S. B. Liggett, Bitter taste receptors on airway smooth muscle  
632 bronchodilate by localized calcium signaling and reverse obstruction. *Nat. Med.* **16**, 1299–  
633 1304 (2010).
- 634 24. T. J. Wellman, J. R. Mondoñedo, G. S. Davis, J. H. T. Bates, B. Suki, Topographic  
635 distribution of idiopathic pulmonary fibrosis: a hybrid physics- and agent-based model.  
636 *Physiol. Meas.* **39**, 064007 (2018).
- 637 25. F. Liu, J. D. Mih, B. S. Shea, A. T. Kho, A. S. Sharif, A. M. Tager, D. J. Tschumperlin,  
638 Feedback amplification of fibrosis through matrix stiffening and COX-2 suppression. *J.*  
639 *Cell Biol.* **190**, 693–706 (2010).
- 640 26. T. R. Cox, J. T. Erler, Remodeling and homeostasis of the extracellular matrix:  
641 implications for fibrotic diseases and cancer. *Dis. Model. Mech.* **4**, 165–78 (2011).
- 642 27. A. M. Briones, S. M. Arribas, M. Salaces, Role of extracellular matrix in vascular  
643 remodeling of hypertension. *Curr. Opin. Nephrol. Hypertens.* **19**, 187–94 (2010).
- 644 28. A. R. Harper, J. A. Summers, The dynamic sclera: extracellular matrix remodeling in  
645 normal ocular growth and myopia development. *Exp. Eye Res.* **133**, 100–11 (2015).
- 646 29. J. M. Phillip, I. Aifuwa, J. Walston, D. Wirtz, The Mechanobiology of Aging. *Annu. Rev.*  
647 *Biomed. Eng.* **17**, 113–141 (2015).
- 648 30. M. W. Pickup, J. K. Mouw, V. M. Weaver, The extracellular matrix modulates the  
649 hallmarks of cancer. *EMBO Rep.* **15**, 1243–1253 (2014).
- 650 31. M. C. Lampi, C. A. Reinhart-King, Targeting extracellular matrix stiffness to attenuate  
651 disease: From molecular mechanisms to clinical trials. *Sci. Transl. Med.* **10**, eaao0475  
652 (2018).
- 653 32. J. A. Sparano, P. Bernardo, P. Stephenson, W. J. Gradishar, J. N. Ingle, S. Zucker, N. E.  
654 Davidson, Randomized Phase III Trial of Marimastat Versus Placebo in Patients With  
655 Metastatic Breast Cancer Who Have Responding or Stable Disease After First-Line  
656 Chemotherapy: Eastern Cooperative Oncology Group Trial E2196. *J. Clin. Oncol.* **22**,  
657 4683–4690 (2004).
- 658 33. A. Winer, S. Adams, P. Mignatti, Matrix Metalloproteinase Inhibitors in Cancer Therapy:  
659 Turning Past Failures Into Future Successes. *Mol. Cancer Ther.* **17**, 1147–1155 (2018).
- 660 34. K. K. Chiou, J. W. Rocks, C. Yingxian, S. Cho, K. E. Merkus, A. Rajaratnam, C. Y. Chen,  
661 S. Cho, K. E. Merkus, A. Rajaratnam, P. Robison, M. Tewari, K. Vogel, S. F. Majkut, B.  
662 L. Prosser, D. E. Discher, A. J. Liu, Mechanical signaling coordinates the embryonic  
663 heartbeat. *Proc. Natl. Acad. Sci. U. S. A.* **113**, 8939–44 (2016).
- 664 35. N. L. Allbritton, T. Meyer, L. Stryer, Range of messenger action of calcium ion and  
665 inositol 1,4,5-trisphosphate. *Science.* **258**, 1812–5 (1992).
- 666 36. G. D. Dickinson, K. L. Ellefsen, S. P. Dawson, J. E. Pearson, I. Parker, Hindered  
667 cytoplasmic diffusion of inositol trisphosphate restricts its cellular range of action. *Sci.*  
668 *Signal.* **9**, ra108–ra108 (2016).
- 669 37. J. A. Felix, M. L. Woodruff, E. R. Dirksen, Stretch increases inositol 1,4,5-trisphosphate  
670 concentration in airway epithelial cells. *Am. J. Respir. Cell Mol. Biol.* **14**, 296–301 (1996).
- 671 38. Y. Tanaka, S. Hata, H. Ishiro, K. Ishii, K. Nakayama, Quick stretch increases the  
672 production of inositol 1,4,5-trisphosphate (IP3) in porcine coronary artery. *Life Sci.* **55**,

- 673 227–235 (1994).
- 674 39. S. S. An, T. R. Bai, J. H. T. Bates, J. L. Black, R. H. Brown, V. Brusasco, P. Chitano, L.  
675 Deng, M. Dowell, D. H. Eidelman, B. Fabry, N. J. Fairbank, L. E. Ford, J. J. Fredberg, W.  
676 T. Gerthoffer, S. H. Gilbert, R. Gosens, S. J. Gunst, A. J. Halayko, R. H. Ingram, C. G.  
677 Irvin, A. L. James, L. J. Janssen, G. G. King, D. a Knight, A. M. Lauzon, O. J. Lakser, M.  
678 S. Ludwig, K. R. Lutchen, G. N. Maksym, J. G. Martin, T. Mauad, B. E. McParland, S. M.  
679 Mijailovich, H. W. Mitchell, R. W. Mitchell, W. Mitzner, T. M. Murphy, P. D. Paré, R.  
680 Pellegrino, M. J. Sanderson, R. R. Schellenberg, C. Y. Seow, P. S. P. Silveira, P. G. Smith,  
681 J. Solway, N. L. Stephens, P. J. Sterk, a G. Stewart, D. D. Tang, R. S. Tepper, T. Tran, L.  
682 Wang, Airway smooth muscle dynamics: a common pathway of airway obstruction in  
683 asthma. *Eur. Respir. J. Off. J. Eur. Soc. Clin. Respir. Physiol.* **29**, 834–60 (2007).
- 684 40. J. S. Davidson, I. M. Baumgarten, Glycyrrhetic Acid Derivatives: A Novel Class of  
685 Inhibitors of Gap-Junctional Intercellular Communication. Structure-Activity  
686 Relationships. *J. Pharmacol. Exp. Ther.* **246**, 1104–1107 (1988).
- 687

688 **Acknowledgments: Funding:** This work was supported by NIH grants HL129468 and HL122513  
689 (HP) and GM110268 (EJC). **Author contributions:** SS & HP conceived the idea and designed the  
690 experiments. With few exceptions, all experimental measurements and data analysis were  
691 performed by SS. RR and JB performed the gap-FRAP experiments. RR also performed the gap  
692 junction staining. SS, RR, JB, EJC & HP contributed to writing the manuscript and analysis of the  
693 data. HP is the corresponding author who conceived and directed this project.

694

695 **Competing interests:** The authors declare that they have no competing interests.

696

697 **Data and materials availability:** Data supporting the findings of this study are available within  
698 the manuscript. All other relevant data are available from authors upon reasonable request.

699

700

701

702

703

704

705

706

707

708

709

710

711

712

713

714

715

716

717

718

719

720

721

722

723  
724  
725  
726

## Figures and Tables

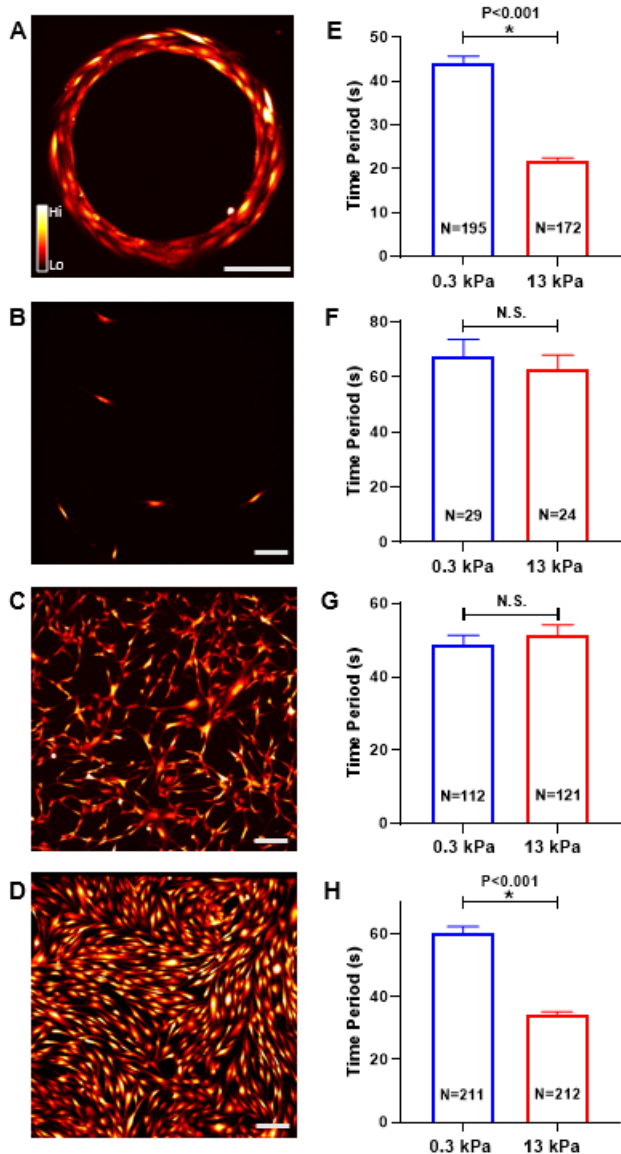

727

728

729

730

731

732

733

734

735

736

737

738

739

740

741

**Fig. 1. Effect of matrix stiffness on agonist-induced  $Ca^{2+}$  oscillations in SMCs.** (A) To study the role of altered matrix stiffness on the frequency of  $Ca^{2+}$  oscillations, we used micropatterning to create a 2D approximation of the in-situ organization of SMCs. Cells were also cultured on non-patterned surfaces in three different seeding densities: (B) isolated, (C) sparse, and (D) confluent. Variations in cytosolic  $[Ca^{2+}]$  were tracked with a fluorescent  $Ca^{2+}$  sensitive dye. Cytosolic  $Ca^{2+}$  concentration is pseudo-colored and increases from black to red to yellow to white, following the color bar. Scale bar=200  $\mu$ m. The mean time periods of agonist-induced  $Ca^{2+}$  oscillations were measured for each cell in these conditions on soft (0.3 kPa) and stiff (13 kPa) substrates. (E) Increasing matrix stiffness caused a significant decrease in  $Ca^{2+}$  oscillation period in SMCs patterned in a ring (Mann-Whitney test). (F, G) In both the isolated and sparse culture conditions, SMC  $Ca^{2+}$  oscillations were not affected by matrix stiffness, and the mean periods were not statistically significantly different (Mann-Whitney tests,  $P=0.668$ ,  $P=0.658$ , respectively). (H) However, in the confluent condition, matrix stiffening caused a large decrease in  $Ca^{2+}$



742  
743  
744  
745  
746  
747

oscillation time period (increase in frequency). The mean period decreased by half from soft to a stiff matrix, as it did in the ring SMCs (E) (Mann-Whitney test). The height of each bar represents the mean value across the number of cells, indicated in the figure by N, and the error bar represents the standard error of the measurements. Statistical significance is indicated in figures with an asterisk and labeled p value for the statistical test. Measurements that are not statistically significant are labeled N.S.

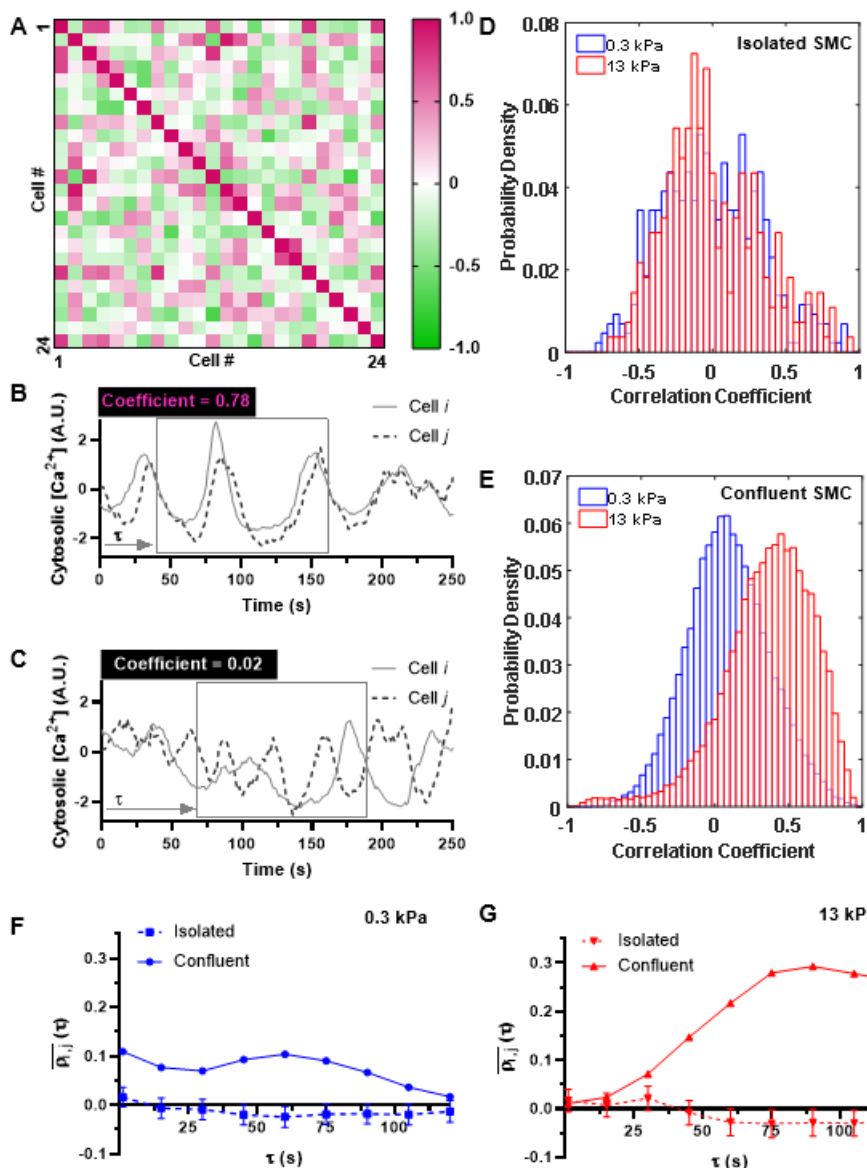

748

749

750

751

752

753

754

755

756

757

758

759

**Fig. 2. Effect of matrix stiffness and confluence on the correlated nature of  $Ca^{2+}$  oscillations.** (A) The cross-correlation coefficient  $\rho$  was calculated for the  $Ca^{2+}$  oscillation time series of every possible pair of SMCs in confluent and isolated conditions. The coefficients range in values from 1 (positively correlated) (pink) to 0 (uncorrelated) (white) to -1 (negatively correlated) (green), as shown in a representative 24x24 matrix from 24 cells. (B) The  $Ca^{2+}$  oscillations from a pair of SMCs with a cross-correlation coefficient of 0.78. (C) The  $Ca^{2+}$  oscillations from a pair of SMCs with a cross-correlation coefficient of 0.02. (D) The probability density of correlation coefficients shows that isolated cells on both soft (blue) (N=435 cell-pairs) and stiff (red) (N=276 cell-pairs) matrix are generally uncorrelated, with the histogram of correlation coefficients centered around 0. (E) There is a dramatic positive shift in the correlation coefficient histogram for confluent cells on stiff

760  
761  
762  
763  
764  
765  
766  
767

matrix, indicating that confluent SMCs on a stiff matrix have more synchronized  $\text{Ca}^{2+}$  oscillations ( $N=31125$  cell-pairs). **(F, G)** To investigate the time it takes after the addition of histamine for the  $\text{Ca}^{2+}$  oscillations to synchronize, we used a time window of 120 seconds starting at  $t=60$  seconds after addition of histamine and repeated the  $\rho_{i,j}$  calculation for the  $\text{Ca}^{2+}$  time series within the 120 seconds window for all cells in the cluster. The time window was then shifted in increments of  $\tau = 15$  seconds over the rest of the 5-minute time frame over which we measured  $\text{Ca}^{2+}$  oscillations. **(F)**  $\overline{\rho_{i,j}}(\tau)$  on soft matrix and **(G)**  $\overline{\rho_{i,j}}(\tau)$  on stiff matrix. Error bars indicate standard error.

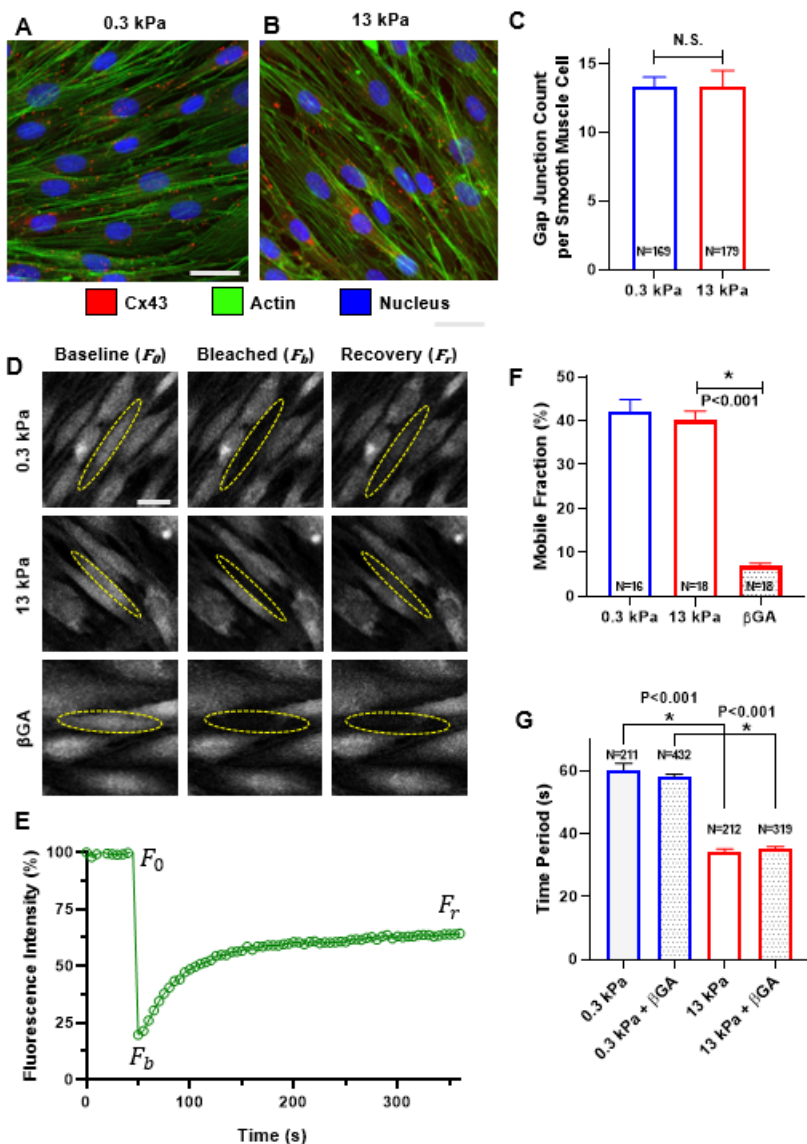

768

769  
770  
771  
772  
773  
774  
775  
776  
777

**Fig. 3. Effect of matrix stiffness on intercellular communication via gap junctions.** Confluent SMCs on soft **(A)** and stiff **(B)** matrix was stained for the gap junction protein Cx43 (red), actin (green), and the nucleus (blue). The number of gap junctions per SMC was measured for each matrix stiffness. The mean, number of cells, and standard error are shown in **(C)**. We found no statistical difference between the number of gap junctions per cell on soft vs stiff matrix (Mann-Whitney test,  $P=0.507$ ). In order to quantify diffusion through gap junctions, we used a technique called gap-FRAP. Briefly, a confluent layer of SMCs was incubated with membrane-permeable calcein-AM. Upon entering the cell, the acetyl methyl ester bond was hydrolyzed by intracellular esterases, trapping the hydrophilic

778 calcein molecule within the cell and it can only diffuse between cells through gap junctions.  
 779 The baseline fluorescence of a cell was recorded (**D, column 1**), then the target cell was  
 780 photobleached to ~20% of its baseline intensity (**D, column 2**). The fluorescent signal of  
 781 the bleached cell was recorded for an additional 5 minutes to allow for diffusion of  
 782 fluorescent molecules between coupled cells, leading to a recovery in fluorescence (**D,**  
 783 **column 3**). (**E**) shows a representative recovery curve over this experiment for one cell  
 784 which recovered ~40% of its initial fluorescence. These values were used to calculate  
 785 mobile fraction, a measure of diffusion efficiency through gap junctions. The mean mobile  
 786 fraction for N cells is shown in (**F**) with standard error bars. Matrix stiffness had no effect  
 787 on the mobile fraction ( $P=0.532$ , t-test). The gap junction blocker 18 $\beta$ -glycyrrhetic acid  
 788 ( $\beta$ GA) significantly reduced the recovery (**D, row 3**) and mobile fraction (**F**) (t-test). (**G**)  
 789 Despite blocking gap junctions with  $\beta$ GA, there was no effect on  $\text{Ca}^{2+}$  oscillation periods in  
 790 confluent cells on either soft or stiff matrix (two-way ANOVA). Scale bars= 30  $\mu\text{m}$ .

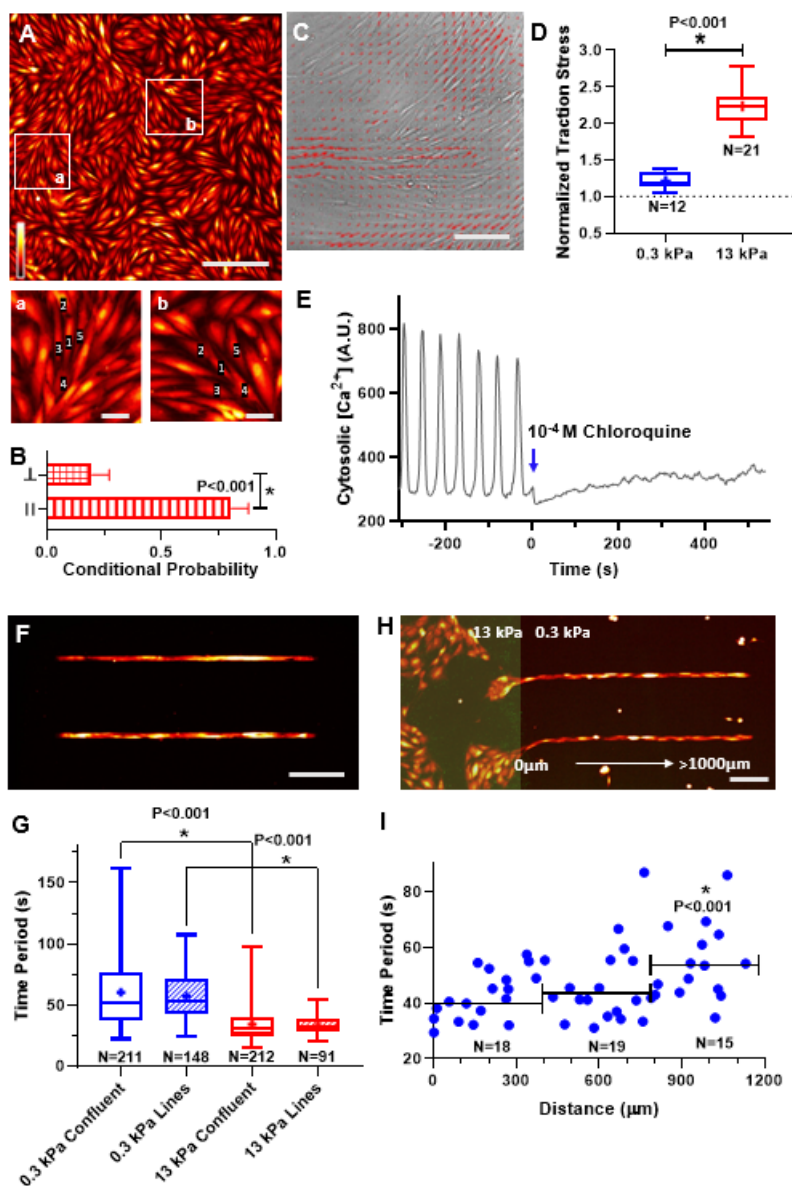

791  
 792 **Fig. 4. The role of mechanical force in  $\text{Ca}^{2+}$  wave propagation through multicellular**  
 793 **ensembles of SMCs. (A)** SMCs in confluent layers form organized clusters of cells, with  
 794 certain cells aligned end-to-end along their contractile axis (parallel), and others branching

795 off at an angle (perpendicular). Scale bar=250  $\mu\text{m}$ . Insets **(a)** & **(b)** show cells 2 and 4 are  
796 considered parallel to the contractile axis of cell 1, whereas cells 3 and 5 are considered  
797 perpendicular to the contractile axis of cell 1. Inset scale bars=50  $\mu\text{m}$ . The cytosolic  $[\text{Ca}^{2+}]$   
798 is pseudo-colored as in **Fig. 1**. The conditional probability for a localized increase in  $\text{Ca}^{2+}$   
799 in cell 1 to be followed by an increase in a parallel or perpendicular neighbor is plotted in  
800 **(B)** with mean $\pm$ sd.  $\text{Ca}^{2+}$  waves were statistically more likely to propagate along the direction  
801 of the contractile axis (N=50 cells, Mann-Whitney test). **(C)** Overlaying the traction-stress  
802 vectors onto a phase-contrast image of confluent SMCs, we observe that the contractile axis  
803 of the cells aligns with the long axis of the cell. Scale bar=150  $\mu\text{m}$ . **(D)** Histamine caused  
804 SMC traction to increase by 20% on soft matrix. On stiff matrix, the same dose caused a  
805 two-fold increase in force. **(E)** Histamine-induced  $\text{Ca}^{2+}$  oscillations ceased immediately  
806 after exposure to chloroquine, a muscle relaxant. **(F)** When SMCs were patterned in lines,  
807 **(G)** the probability of finding SMCs with high time periods decreased and the variance of  
808 the time periods from aligned cells was significantly smaller than confluent cells (F-test,  
809  $P<0.001$ ). Matrix stiffness still affected the oscillation period (Mann-Whitney test). To  
810 probe the limits of the SMC cluster's collective matrix sensing abilities, we simulated  
811 localized ECM stiffening by **(H)** patterning SMCs in lines spanning a dual-stiffness PDMS  
812 substrate ( $E=13$  kPa highlighted in green, left, and  $E=0.3$  kPa, right). The  $\text{Ca}^{2+}$  oscillation  
813 time period of cells along the lines is plotted as a function of the distance from the stiff  
814 matrix **(I)**. Binning cells in 400  $\mu\text{m}$  intervals, only those over 800  $\mu\text{m}$  from stiff matrix had  
815 different  $\text{Ca}^{2+}$  oscillation time periods from cells directly in contact (Mann-Whitney test).  
816 **(F)** and **(H)** scale bars=250  $\mu\text{m}$ .
